# Supplementary material
Source: PubMed Central journal article supplement (PMC5012490)
Supplement: CJN.13121215SupplementaryData1.pdf [file CJN.13121215SupplementaryData1.pdf]

## Author Affiliations using symbols:

Richard L Amdur PhD<sup>§</sup>, Harold I Feldman MD<sup>¶,†,\*</sup>, Jayanta Gupta MD PhD<sup>§§</sup>, Wei Yang PhD<sup>†</sup>, Peter Kanetsky PhD<sup>¶¶</sup>, Michael Shlipak MD<sup>††</sup>, Mahboob Rahman MD<sup>\*\*</sup>, James P Lash MD<sup>§§§</sup>, Raymond R Townsend MD<sup>¶</sup>, Ojo Akinlolu MD<sup>¶¶¶</sup>, Akshay Roy-Chaudhury BA<sup>†††</sup>, Alan S Go MD<sup>\*\*\*</sup>, Marshall Joffe MD<sup>\*</sup>, Jiang He MD<sup>§§§§</sup>, Vaidyanathapuram S Balakrishnan MD<sup>¶¶¶¶</sup>, Paul L Kimmel MD<sup>†††,††††</sup>, John W Kusek PhD<sup>††††</sup>, Dominic S Raj MD<sup>†††</sup> and the CRIC Study Investigators ( Jeffrey Fink MD, Lawrence J. Appel, MD, MPH )

<sup>§</sup>Department of Surgery, George Washington University School of Medicine, Washington DC

<sup>¶</sup>Renal Electrolyte and Hypertension Division, University of Pennsylvania, Philadelphia PA

<sup>†</sup> Department of Biostatistics and Epidemiology, Perelman School of Medicine at the University of Pennsylvania, Philadelphia PA

<sup>\*</sup>Center for Clinical Epidemiology and Biostatistics, Perelman School of Medicine at the University of Pennsylvania, Philadelphia PA

<sup>§§</sup>Division of Biostatistics and Epidemiology, Texas Tech University Health Sciences Center, Lubbock TX

<sup>¶¶</sup>Cancer Epidemiology, Moffitt Cancer Center, Tampa FL

<sup>††</sup> Division of General Internal Medicine, San Francisco VA Medical Center, San Francisco CA

<sup>\*\*</sup> Division of Nephrology and Hypertension, Case Western Reserve University, Cleveland OH

<sup>§§§</sup> Division of Nephrology, University of Illinois, Chicago IL

<sup>¶¶¶</sup> Division of nephrology, University of Michigan, Ann Arbor MI

<sup>†††</sup> Division of Renal Diseases and Hypertension, George Washington University, Washington DC

<sup>\*\*\*</sup> Kaiser Permanente Division of Research, Oakland CA

<sup>§§§§</sup> Department of Epidemiology, Tulane University, New Orleans LA

<sup>¶¶¶¶</sup> Division of Nephrology, Tufts University, Boston MA

<sup>††††</sup> Division of Kidney Urologic and Hematologic Diseases, NIDDK, Bethesda MD
